# Supplementary material for: Electronic Structure Regulated Nickel-Cobalt Bimetal Phosphide Nanoneedles for Efficient Overall Water Splitting
Source: MDPI journal article supplement (doi:10.3390/molecules29030657), 2024-01-31
Supplement: s1 [file s1]

# Supporting Information

**Table S1.** ICP-AES data and atomic ratio of Ni/Co in Ni<sub>x</sub>Co<sub>2-x</sub>P NDs/NF on Ni foam.

| Samples                                 | Feeding ratios | m <sub>Ni</sub> (mg) | m <sub>Co</sub> (mg) | Atomic ratios |
|-----------------------------------------|----------------|----------------------|----------------------|---------------|
| Ni <sub>1.51</sub> Co <sub>0.49</sub> P | 3/1            | 2.974                | 0.971                | 1/0.326       |
| Ni <sub>1.32</sub> Co <sub>0.68</sub> P | 2/1            | 3.327                | 1.715                | 1/0.515       |
| Ni <sub>1.01</sub> Co <sub>0.99</sub> P | 1/1            | 3.456                | 3.363                | 1/0.973       |
| N <sub>0.67</sub> Co <sub>1.33</sub> P  | 1/2            | 0.811                | 1.619                | 1/1.996       |
| Ni <sub>0.51</sub> Co <sub>1.49</sub> P | 1/3            | 0.956                | 2.720                | 1/2.845       |

**Table S2** The binding energy and percent of each species in XPS spectra.

| Sample                                            | Binding                                    | Bonding Energy (eV)                      | Percentage (%)  |
|---------------------------------------------------|--------------------------------------------|------------------------------------------|-----------------|
| <b>Ni<sub>2</sub>P NDs/NF</b>                     | The satellite peaks of Ni;<br>(Co); (P) 2p | 861,879.7; 0,0;<br>129.8,130.5           | 59.8; 0; 5.2    |
|                                                   | Oxidized Ni; (Co) species                  | 855.7,873.4; 0,0                         | 37.3; 0         |
|                                                   | Ni-P; (Co-P); (P-O)                        | 852.6,870.3; 0,0; 134                    | 2.9; 0; 94.8    |
|                                                   |                                            |                                          |                 |
| <b>Ni<sub>1.51</sub>Co<sub>0.49</sub>P NDs/NF</b> | The satellite peaks of Ni;<br>(Co); (P) 2p | 861,879.3; 786.3,803.2;<br>129.5,130.1   | 68.7; 53.5; 6.3 |
|                                                   | Oxidized Ni; (Co) species                  | 855.7,873.5; 781.4,797.1                 | 28.3; 32.7      |
|                                                   | Ni-P; (Co-P); (P-O)                        | 853,867.6; 778.3,793.4;<br>134.9         | 3; 13.8; 93.7   |
|                                                   |                                            |                                          |                 |
| <b>Ni<sub>1.32</sub>Co<sub>0.68</sub>P NDs/NF</b> | The satellite peaks of Ni;<br>(Co); (P) 2p | 862.1,880.6; 786.2,803.3;<br>129.3,130   | 56.8; 62.6; 2.8 |
|                                                   | Oxidized Ni; (Co) species                  | 856.7,874.2; 782,798.1                   | 41.4; 33.2      |
|                                                   | Ni-P; (Co-P); (P-O)                        | 852.7,868.4; 777.7,794.1;<br>134.7       | 1.8; 4.2; 97.2  |
|                                                   |                                            |                                          |                 |
| <b>Ni<sub>1.01</sub>Co<sub>0.99</sub>P NDs/NF</b> | The satellite peaks of Ni;<br>(Co); (P) 2p | 861.7,880.6; 785.3,803;<br>129.2,129.7   | 57.8; 59.9; 5.5 |
|                                                   | Oxidized Ni; (Co) species                  | 856.8,874.8; 781.7,797.9                 | 40; 28.6        |
|                                                   | Ni-P; (Co-P); (P-O)                        | 853.2,869.5; 778.3,793.4;<br>133.5       | 2.2; 11.5; 94.5 |
|                                                   |                                            |                                          |                 |
| <b>Ni<sub>0.67</sub>Co<sub>1.33</sub>P NDs/NF</b> | The satellite peaks of Ni;<br>(Co); (P) 2p | 861.3,880.4; 785.9,803.3;<br>129.2,130.1 | 59.7; 61.9; 2.9 |
|                                                   | Oxidized Ni; (Co) species                  | 856.9,874.8; 781.9,797.8                 | 34.3; 33.8      |
|                                                   | Ni-P; (Co-P); (P-O)                        | 853.1,870.5; 778.5,793.2;<br>133.9       | 6; 4.3; 97.1    |
|                                                   |                                            |                                          |                 |
| <b>Ni<sub>0.52</sub>Co<sub>1.48</sub>P NDs/NF</b> | The satellite peaks of Ni;<br>(Co); (P) 2p | 862,880.7; 786.1,802.8;<br>129.4,130.2   | 63.8; 51.7; 3.7 |
|                                                   | Oxidized Ni; (Co); species                 | 856.7,874.5; 782,798.2                   | 33.7; 31.8      |
|                                                   | Ni-P; (Co-P); (P-O)                        | 852.8,870.9; 778.2,792.3;<br>134.5       | 2.5; 16.5; 96.3 |
|                                                   |                                            |                                          |                 |

**Table S3.** Comparison of HER performance with other reported electrocatalysts.

| Catalysts                                                 | iR correction         | Substrate | $\eta_{10}$ (mV) | Tafel slope (mV/dec) | Ref.      |
|-----------------------------------------------------------|-----------------------|-----------|------------------|----------------------|-----------|
| <b>Ni<sub>1.01</sub>Co<sub>0.99</sub>P NDs/NF</b>         | 90%                   | NF        | 66               | 65.4                 | This work |
| <b>Ni5%CoP</b>                                            | 100%                  |           | 84               | 67                   | 46        |
| <b>NiCoP-5%</b>                                           | -                     |           | 88               | 41                   | 44        |
| <b>CoP@NiCoP</b>                                          | -                     | CC        | 71               | 148                  | 38        |
| <b>0.4-Co<sub>2</sub>P/Ni<sub>x</sub>P<sub>y</sub>@NF</b> | 90%                   | NF        | 80               | 86                   | 34        |
| <b>Mo-NiCoP-3</b>                                         | 100%                  |           | 76               | 60                   | 42        |
| <b>FeP-CoP/NC</b>                                         | Without iR correction | NC        | 79               | 71                   | 43        |
| <b>Co-NixPy@Co<sub>3</sub>O<sub>4</sub></b>               | 100%                  | NF        | 72               | 56.26                | 41        |
| <b>G@Co-W-P</b>                                           | 100%                  |           | 91.5             | 61.2                 | 48        |
| <b>NiFe-LDH/NiCoP</b>                                     | Without iR correction | NF        | 120              | 88.2                 | 49        |
| <b>P-CoNi<sub>2</sub>S<sub>4</sub></b>                    | 100%                  |           | 135              | 65                   | 45        |

**Table S4.** The value of ECSA for each catalyst investigated in 1 M KOH for HER.

| Catalysts                                         | $C_{dl}/mF\ cm^{-2}$ | ECSA/cm <sup>2</sup> |
|---------------------------------------------------|----------------------|----------------------|
| <b>Ni<sub>1.01</sub>Co<sub>0.99</sub>P NDs/NF</b> | 19.56                | 489                  |
| <b>Ni<sub>2</sub>P NDs/NF</b>                     | 1.21                 | 30.25                |
| <b>Ni<sub>1.51</sub>Co<sub>0.49</sub>P NDs/NF</b> | 5.5                  | 137.5                |
| <b>Ni<sub>1.32</sub>Co<sub>0.68</sub>P NDs/NF</b> | 6.42                 | 160.5                |
| <b>Ni<sub>0.67</sub>Co<sub>1.33</sub>P NDs/NF</b> | 7.8                  | 195                  |
| <b>Ni<sub>0.52</sub>Co<sub>1.48</sub>P NDs/NF</b> | 8.65                 | 216.25               |

**Table S5.** Comparison of OER performance with other reported electrocatalysts.

| Catalysts                                                 | iR correction         | Substrate | $\eta_{100}$ (mV) | Tafel slope (mV/dec) | Ref.      |
|-----------------------------------------------------------|-----------------------|-----------|-------------------|----------------------|-----------|
| <b>Ni<sub>0.67</sub>Co<sub>1.33</sub>P NDs/NF</b>         | 90%                   | NF        | 298               | 50.1                 | This work |
| <b>NiCoP-5%</b>                                           | -                     |           | ~330              | 66                   | 44        |
| <b>NiCoP/NF</b>                                           | 100%                  | NF        | ~310              | 49.5                 | 57        |
| <b>0.4-Co<sub>2</sub>P/Ni<sub>x</sub>P<sub>y</sub>@NF</b> | 90%                   | NF        | 300               | 162                  | 34        |
| <b>Mo-NiCoP</b>                                           | 90%                   | NF        | ~320              | 49.4                 | 56        |
| <b>Fe-NiCoP@C</b>                                         | Without iR correction | NF        | 410               | 36                   | 55        |
| <b>Ni-Co-Fe-P</b>                                         | -                     |           | ~340              | 85.64                | 52        |
| <b>Co<sub>2</sub>P/Ni<sub>2</sub>P-2%Mo</b>               | Without iR correction | NF        | 357               | 46.1                 | 57        |
| <b>FeP-CoP/NC</b>                                         | Without iR correction | NC        | 392               | 73                   | 43        |
| <b>CoO-CoP</b>                                            | 90%                   | NF        | 365               | 90                   | 54        |

**Table S6.** The value of ECSA for each catalyst investigated in 1 M KOH for OER.

| Catalysts                                         | C <sub>dl</sub> /mF cm <sup>-2</sup> | ECSA/cm <sup>2</sup> |
|---------------------------------------------------|--------------------------------------|----------------------|
| <b>Ni<sub>0.67</sub>Co<sub>1.33</sub>P NDs/NF</b> | 17.46                                | 436.5                |
| <b>Ni<sub>2</sub>P NDs/NF</b>                     | 0.65                                 | 16.25                |
| <b>Ni<sub>1.51</sub>Co<sub>0.49</sub>P NDs/NF</b> | 11.3                                 | 282.5                |
| <b>Ni<sub>1.32</sub>Co<sub>0.68</sub>P NDs/NF</b> | 6                                    | 150                  |
| <b>Ni<sub>1.01</sub>Co<sub>0.99</sub>P NDs/NF</b> | 3.24                                 | 81                   |
| <b>Ni<sub>0.52</sub>Co<sub>1.48</sub>P NDs/NF</b> | 1.02                                 | 25.5                 |

**Table S7.** Comparison of Overall water splitting performance with other reported electrocatalysts.

| Catalysts                                                                                                       | Substrate | Cell voltage (V)<br>at 100 mA cm <sup>-2</sup> | Ref.      |
|-----------------------------------------------------------------------------------------------------------------|-----------|------------------------------------------------|-----------|
| <b>Ni<sub>0.67</sub>Co<sub>1.33</sub>P NDs/NF    Ni<sub>0.67</sub>Co<sub>1.33</sub>P NDs/NF</b>                 | NF        | 1.62                                           | This work |
| <b>0.4-Co<sub>2</sub>P/Ni<sub>x</sub>P<sub>y</sub>@NF    0.4-Co<sub>2</sub>P/Ni<sub>x</sub>P<sub>y</sub>@NF</b> | NF        | 1.74                                           | 44        |
| <b>NiCoP/CC    NiCoP/CC</b>                                                                                     | NF        | ~1.77                                          | 37        |
| <b>CeO<sub>2</sub>-NiCoP    CeO<sub>2</sub>-NiCoP</b>                                                           | NF        | ~1.68                                          | 34        |
| <b>Mo-NiCoP    Mo-NiCoP</b>                                                                                     | NF        | 1.70                                           | 56        |
| <b>NiCoP/NF    NiCoP/NF</b>                                                                                     | NF        | 1.74                                           | 57        |
| <b>NFP500-30    NFP500-30</b>                                                                                   | NF        | 1.76                                           | 58        |

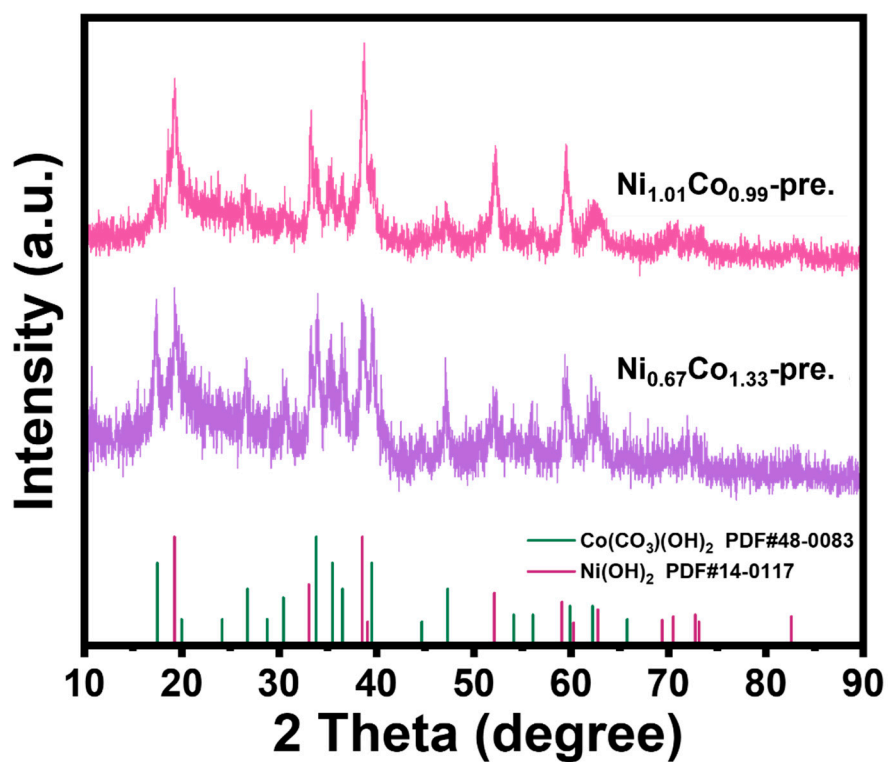

Figure S1. XRD patterns of  $\text{Ni}_x\text{Co}_{2-x}\text{-pre.}$  without NF.

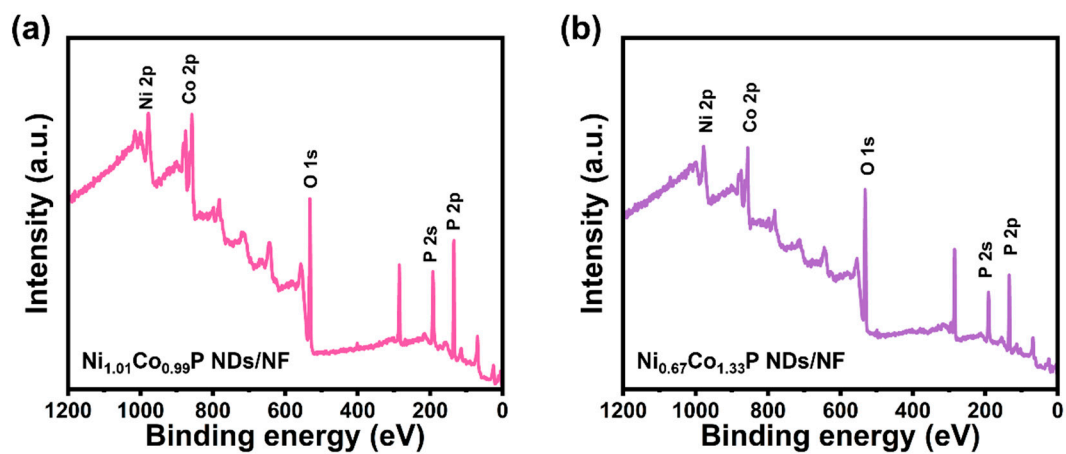

Figure S2. XPS full spectra of (a)  $\text{Ni}_{1.01}\text{Co}_{0.99}\text{P NDs/NF}$  and (b)  $\text{Ni}_{0.67}\text{Co}_{1.33}\text{P NDs/NF}$ .

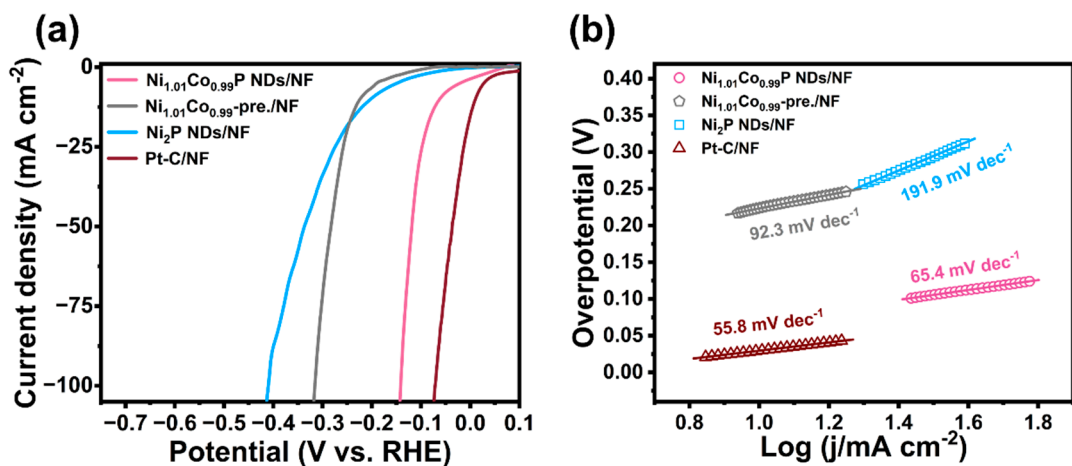

**Figure S3.** The effects of phosphating on the HER activity of the  $\text{Ni}_{1.01}\text{Co}_{0.99}\text{P NDs/NF}$  in 1 M KOH electrolyte. (a) LSV curves for HER, (b) The Tafel plots corresponding to HER LSV curves

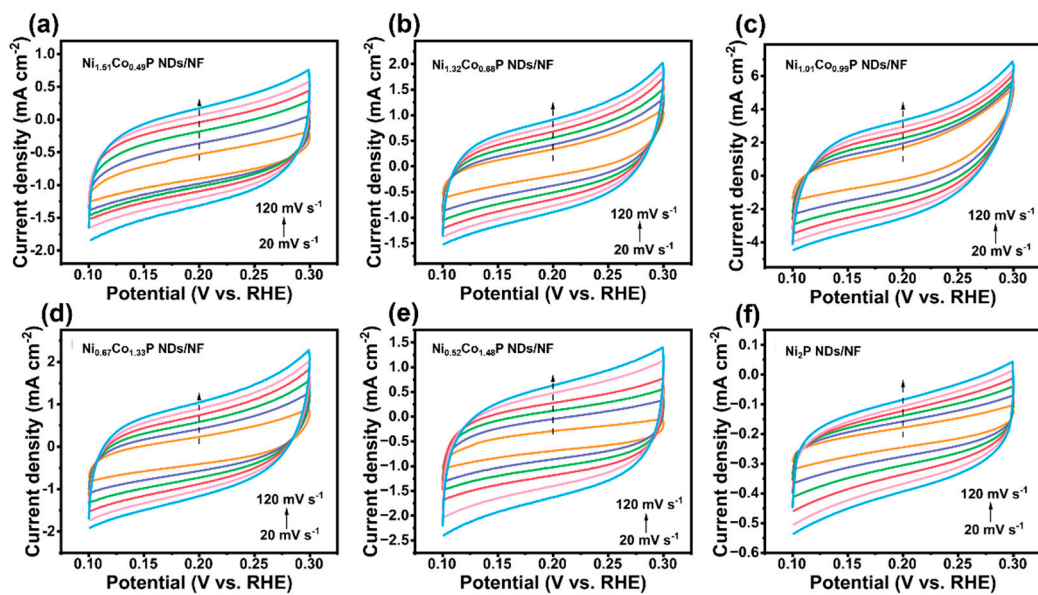

**Figure S4.** CV curves at different scanning rates 20, 40, 60, 80, 100, 120  $\text{mV s}^{-1}$  for HER in 1.0 M KOH

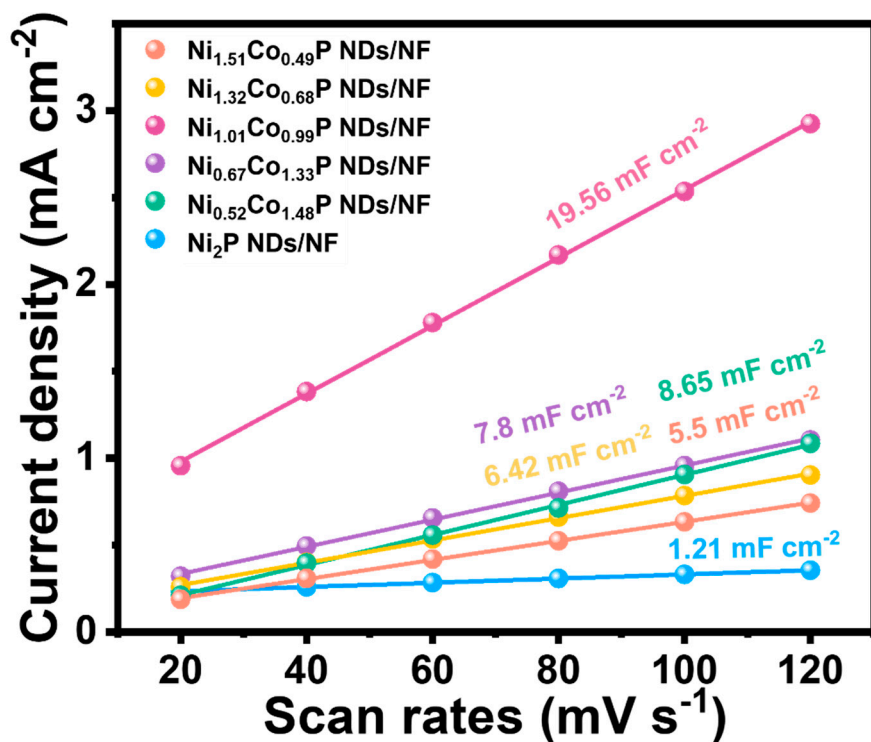

Figure S5. Cdl values of different catalysts for HER in 1.0 M KOH

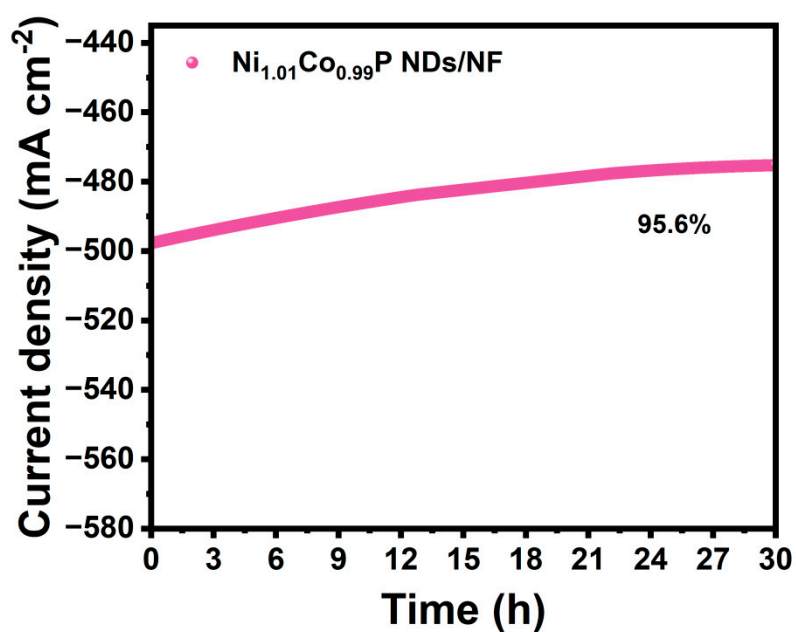

Figure S6. Time-dependent current density curve of Ni<sub>1.01</sub>Co<sub>0.99</sub>P NDs/NF under static potential of -1.24 V for 30 h.



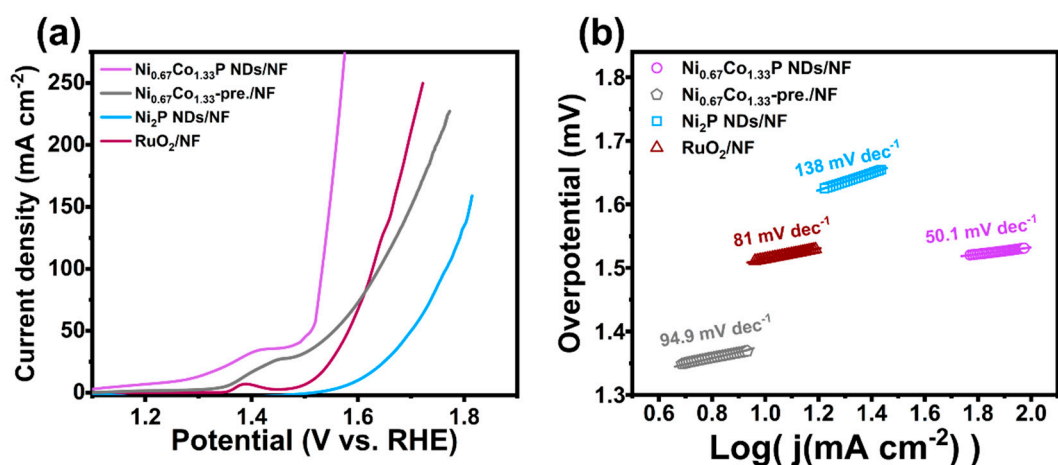

**Figure S7.** The effects of phosphating on the OER activity of the  $\text{Ni}_{0.67}\text{Co}_{1.33}\text{P NDs/NF}$  in 1 M KOH electrolyte. (a) LSV curves for OER, (b) The Tafel plots corresponding to HER LSV curves.

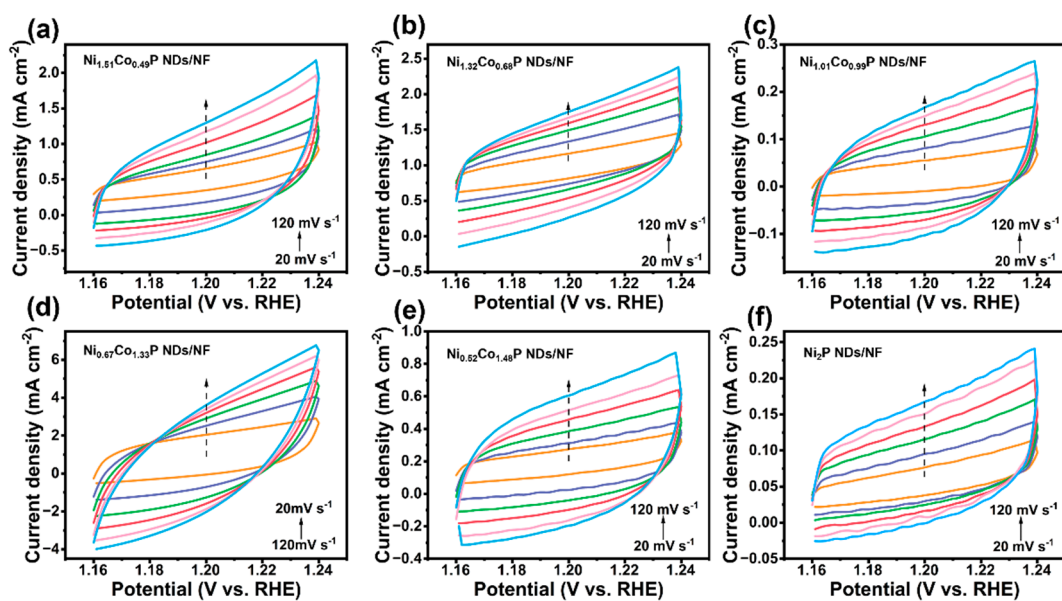

**Figure S8.** CV curves at different scanning rates of 20, 40, 60, 80, 100, 120  $\text{mV s}^{-1}$  for OER in 1.0 M KOH

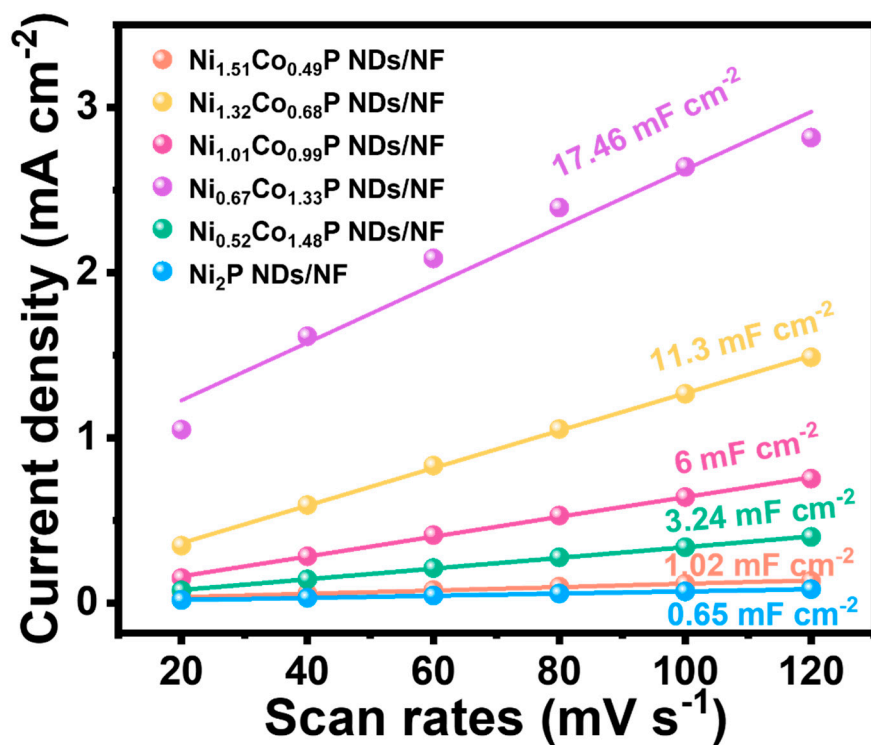

Figure S9. Cdl values of different catalysts for OER in 1.0 M KOH

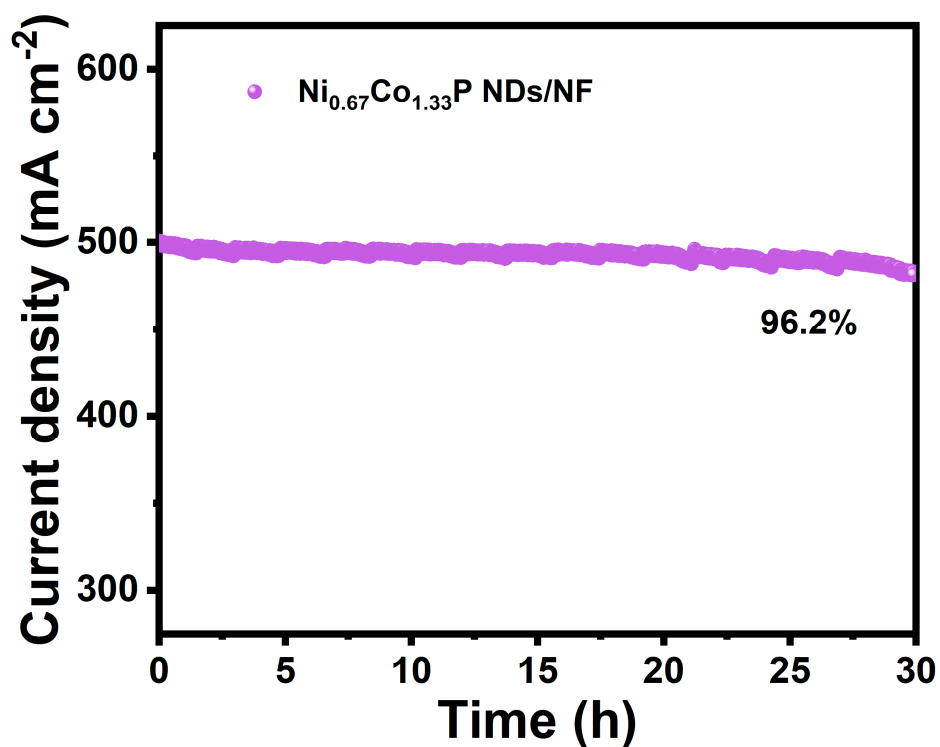

Figure S10. Time-dependent current density curve of  $\text{Ni}_{0.67}\text{Co}_{1.33}\text{P NDs/NF}$  under static potential of 1.32 V for 30 h.

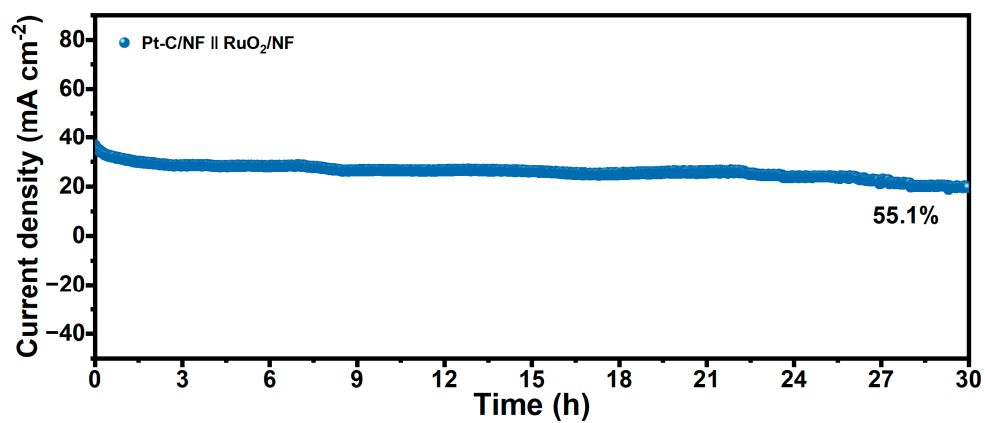

**Figure S11.** Time-dependent current density curve for Pt-C/NF || RuO<sub>2</sub>/NF at a potential of 1.58 V

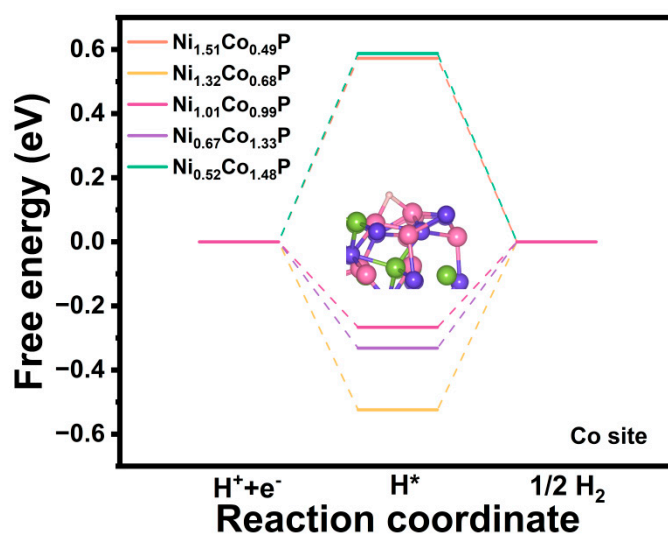

**Figure S12.** Reaction free-energy diagrams for HER of Co site on Ni<sub>x</sub>Co<sub>2-x</sub>P.

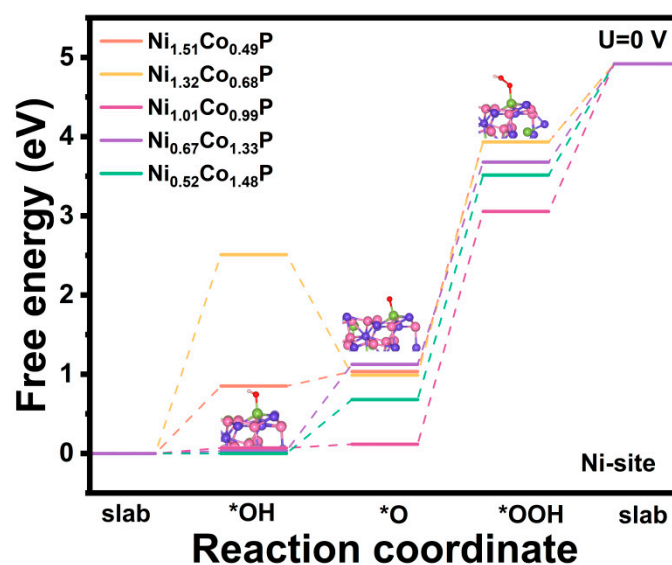

**Figure S13.** Reaction free-energy diagrams for OER of Ni site on  $\text{Ni}_x\text{Co}_{2-x}\text{P}$  at 0 V.

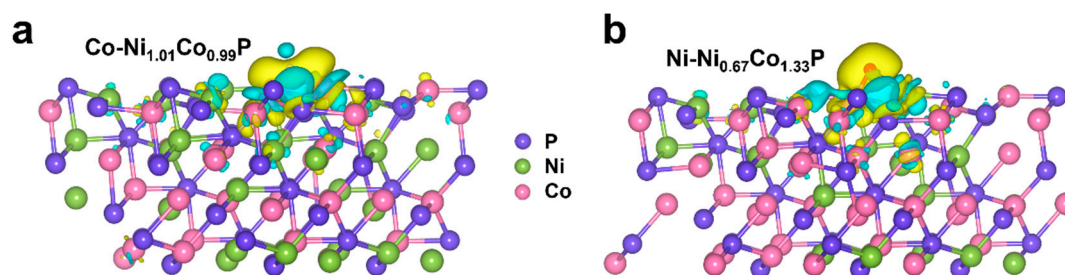

**Figure S14.** Calculated charge density differences of (a)  $\text{Co-Ni}_{1.01}\text{Co}_{0.99}\text{P}$  for HER and (b)  $\text{Ni-Ni}_{0.67}\text{Co}_{1.33}\text{P}$  for OER. The Ni, Co, and P atoms are marked in green, rose red, and purple, respectively. The yellow and cyan regions refer to increased and decreased charge distributions, respectively.

## References

- [34] H. Liu, Y. Zhang, R. Ge, J.M. Cairney, R. Zheng, A. Khan, S. Li, B. Liu, L. Dai, W. Li, Tailoring the electronic structure of Ni<sub>5</sub>P<sub>4</sub>/Ni<sub>2</sub>P catalyst by Co<sub>2</sub>P for efficient overall water electrolysis, *Appl. Energy* 349 (2023), 121582.
- [37] C. Du, L. Yang, F. Yang, G. Cheng, W. Luo, Nest-like NiCoP for Highly Efficient Overall Water Splitting, *ACS Catal.* 7(6) (2017) 4131-4137.
- [38] R. Hu, L. Jiao, H. Liang, Z. Feng, B. Gao, X.F. Wang, X.Z. Song, L.Z. Liu, Z. Tan, Engineering Interfacial Built-in Electric Field in Polymetallic Phosphide Heterostructures for Superior Supercapacitors and Electrocatalytic Hydrogen Evolution, *Small* (2023), 2304132.
- [41] B. Lu, J. Zang, W. Li, J. Li, Q. Zou, Y. Zhou, Y. Wang, Co-doped Ni<sub>x</sub>P<sub>y</sub> loading on Co<sub>3</sub>O<sub>4</sub> embedded in Ni foam as a hierarchically porous self-supported electrode for overall water splitting, *Chem. Eng. J.* 422 (2021), 130062.
- [42] J. Lin, Y. Yan, C. Li, X. Si, H. Wang, J. Qi, J. Cao, Z. Zhong, W. Fei, J. Feng, Bifunctional Electrocatalysts Based on Mo-Doped NiCoP Nanosheet Arrays for Overall Water Splitting, *Nano-Micro Letters* 11 (2019), 55.
- [43] X. Yan, J. Biemolt, K. Zhao, Y. Zhao, X. Cao, Y. Yang, X. Wu, G. Rothenberg, N. Yan, A membrane-free flow electrolyzer operating at high current density using earth-abundant catalysts for water splitting, *Nat. Commun.* 12 (2021) 1-9.
- [44] Y. Zhao, J. Zhang, Y. Xie, B. Sun, J. Jiang, W. Jiang, S. Xi, H.Y. Yang, K. Yan, S. Wang, X. Guo, P. Li, Z. Han, X. Lu, H. Liu, G. Wang, Constructing Atomic Heterometallic Sites in Ultrathin Nickel-Incorporated Cobalt Phosphide Nanosheets

via a Boron-Assisted Strategy for Highly Efficient Water Splitting, *Nano Letters* 21 (2021) 823-832.

[45] X.F. Lu, S.L. Zhang, W.L. Sim, S. Gao, X.W. Lou, Phosphorized CoNi<sub>2</sub>S<sub>4</sub> Yolk-Shell Spheres for Highly Efficient Hydrogen Production via Water and Urea Electrolysis, *Angew. Chem. Int. Ed.* 60 (2021) 22885-22891.

[46] L. Zhao, M. Wen, Y. Tian, Q. Wu, Y. Fu, A novel structure of quasi-monolayered NiCo-bimetal-phosphide for superior electrochemical performance, *J. Energy Chem.* 74 (2022) 203-211.

[48] X. Wang, J.B. Le, Y. Fei, R. Gao, M. Jing, W. Yuan, C.M. Li, Self-assembled ultrasmall mixed Co–W phosphide nanoparticles on pristine graphene with remarkable synergistic effects as highly efficient electrocatalysts for hydrogen evolution, *J. Mater. Chem. A.* 10 (2022) 7694-7704.

[49] H. Zhang, X. Li, A. Hähnel, V. Naumann, C. Lin, S. Azimi, S.L. Schweizer, A.W. Maijenburg, R.B. Wehrspohn, Bifunctional Heterostructure Assembly of NiFe LDH Nanosheets on NiCoP Nanowires for Highly Efficient and Stable Overall Water Splitting, *Adv. Funct. Mater.* 28 (2018), 1706847.

[52] Y. Wang, Y. Wang, H. Gao, Z. Huang, Q. Hao, B. Liu, Interface-induced contraction of core–shell Prussian blue analogues toward hollow Ni-Co-Fe phosphide nanoboxes for efficient oxygen evolution electrocatalysis, *Chem. Eng. J.* 451 (2023), 138515.

[54] K. Chen, Y. Cao, W. Wang, J. Diao, J. Park, V. Dao, G.-C. Kim, Y. Qu, I.-H. Lee, Effectively enhanced activity for overall water splitting through interfacially strong

P–Co–O tetrahedral coupling interaction on CoO/CoP heterostructure hollow-nanoneedles, *J. Mater. Chem. A* 11 (2023) 3136-3147.

[55] Y. Kang, S. Wang, S. Zhu, H. Gao, K.S. Hui, C.-Z. Yuan, H. Yin, F. Bin, X.-L. Wu, W. Mai, L. Zhu, M. Hu, F. Liang, F. Chen, K.N. Hui, Iron-modulated nickel cobalt phosphide embedded in carbon to boost power density of hybrid sodium–air battery, *Appl. Catal. B Environ.* 285 (2021), 119786.

[56] Y. Zhao, J. Chen, S. Zhao, W. Zhou, R. Dai, X. Zhao, Z. Chen, T. Sun, H. Zhang, A. Chen, Mo-doped NiCoP nanowire array grown in situ on Ni foam as a high-performance bifunctional electrocatalyst for overall water splitting, *J. Alloys Compd.* 918 (2022), 165802.

[57] H. Liu, M. Jin, D. Zhan, J. Wang, X. Cai, Y. Qiu, L. Lai, Stacking faults triggered strain engineering of ZIF-67 derived Ni-Co bimetal phosphide for enhanced overall water splitting, *Appl. Catal. B Environ.* 272 (2020), 118951.

[58] H.-S. Hu, Y. Li, Y.-R. Shao, K.-X. Li, G. Deng, C.-B. Wang, Y.-Y. Feng, NiCoP nanorod arrays as high-performance bifunctional electrocatalyst for overall water splitting at high current densities, *J. Power Sources* 484 (2021), 229269.

[59] R. Narasimman, G. Jnanapriya, S. Sujatha, S.A. Ilangovan, Vertically aligned nickel-iron-phosphide nanosheets on three-dimensional porous nickel foam for overall water splitting, *J. Alloys Compd.* 947 (2023), 169474.
